# Supplementary material for: Short heat shock factor A2 regulates heat resistance and growth balance in Arabidopsis
Source: eLife journal article supplement (doi:10.7554/elife.99937), 2024-09-25

**Source data 1.** PDF file containing original western blots for **Figure 3–figure supplement 1**, showing the relevant bands boxed and labelled.

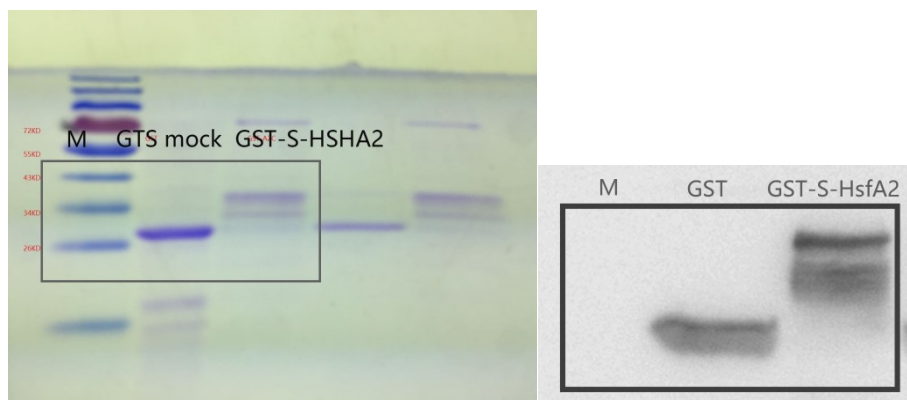

Supplement: fig3-figsupp1-data1 [file elife-99937-fig3-figsupp1-data1-v1.pdf]
